# Supplementary material
Source: PubMed Central journal article supplement (PMC2912509)

Supplementary Figure 1

■ Different view    □ Same view

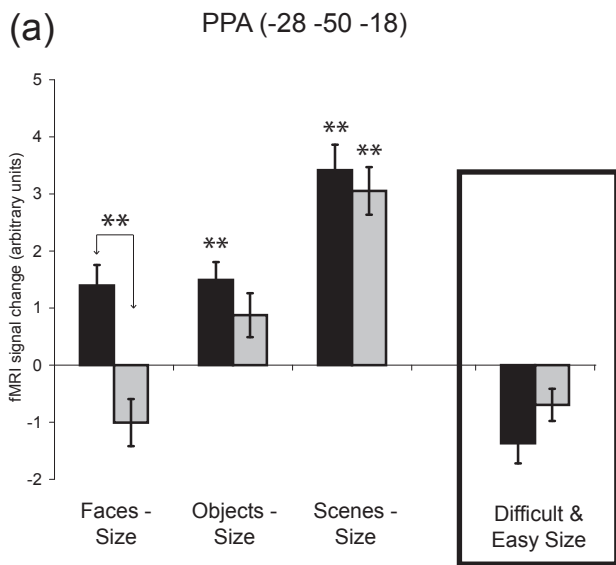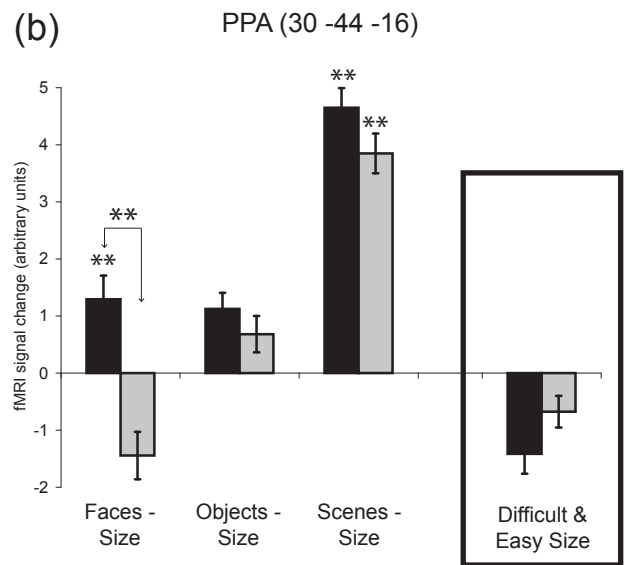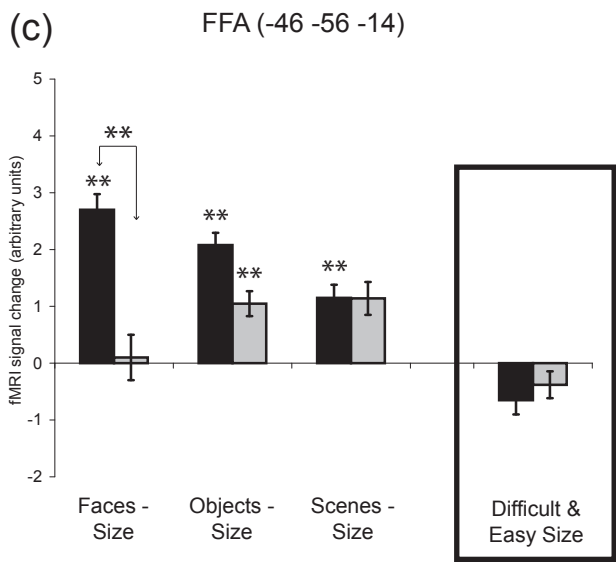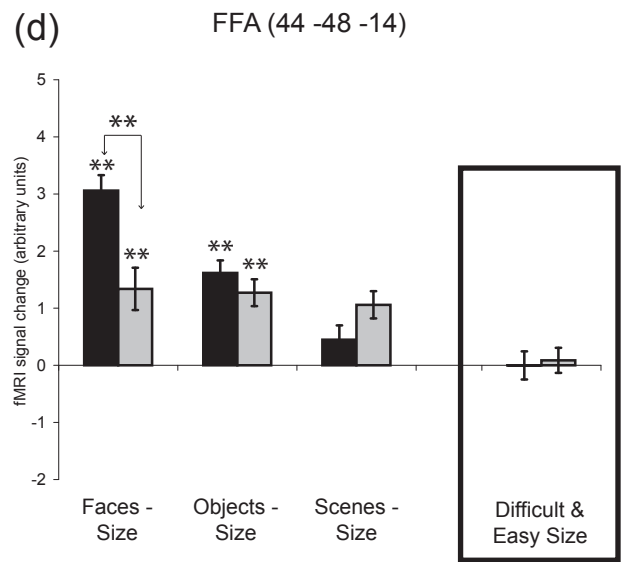

Supplement: NIHMS31526-supplement-Supplementary_Figure.pdf [file NIHMS31526-supplement-Supplementary_Figure.pdf]
